# Supplementary material
Source: MDPI journal article supplement (https://www.mdpi.com/2073-4344/9/9/781)
Supplement: s1 [file s1 › catalysts-594448-SI.pdf]

# Supporting Information

## Effect of Copper Precursors on the Activity and Hydrothermal Stability of **Cu<sup>II</sup>-SSZ-13** NH<sub>3</sub>-SCR Catalysts

Meixin Wang <sup>1</sup>, Zhaoliang Peng <sup>1</sup>, Changming Zhang <sup>1</sup>, Mengmeng Liu <sup>1</sup>, Lina Han <sup>2</sup>,  
Yaqin Hou <sup>3</sup>, Zhanggen Huang <sup>3</sup>, Jiancheng Wang <sup>1,\*</sup>, Weiren Bao <sup>1</sup> and Liping Chang <sup>1</sup>

<sup>1</sup> Key Laboratory of Coal Science and Technology, Ministry of Education and Shanxi  
Province, Taiyuan University of Technology, Taiyuan, 030024, China

<sup>2</sup> College of Materials Science and Engineering, Taiyuan University of Technology,  
Taiyuan 030024, China

<sup>3</sup> State Key Laboratory of Coal Conversion, Institute of Coal Chemistry, Chinese  
Academy of Sciences, Taiyuan, 030001, China

\* Correspondence: wangjiancheng@tyut.edu.cn; Tel.: +86-138-3462-9730

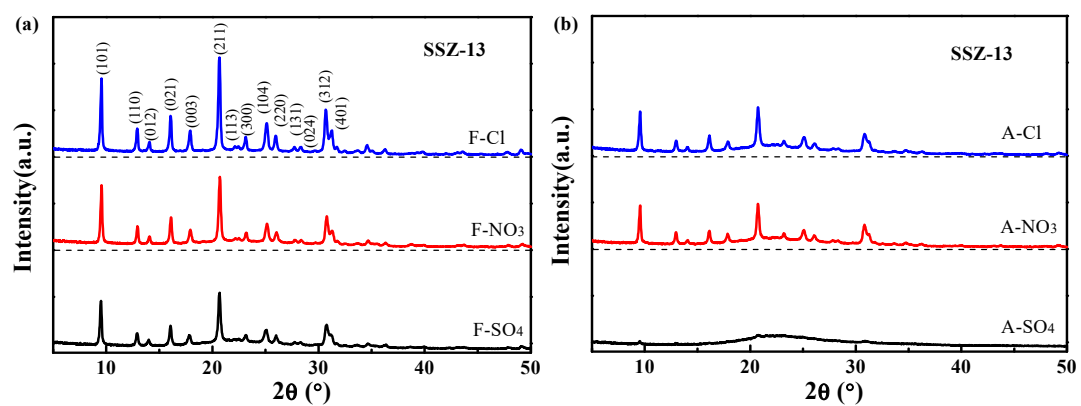

**Figure S1.** XRD patterns of Cu<sup>II</sup>-SSZ-13 catalysts before (a) and after (b) hydrothermal aging treatment.

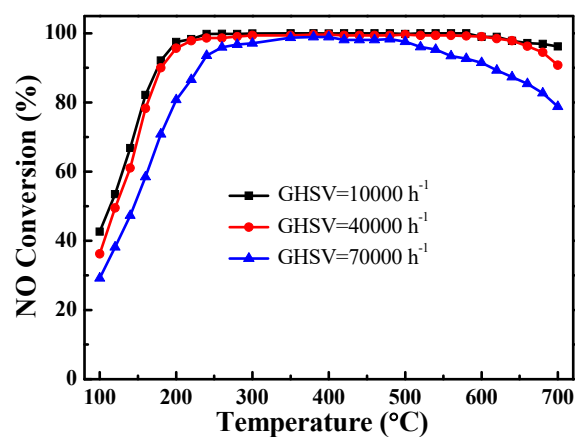

**Figure S2.** Gaseous hourly space velocity (GHSV) of fresh Cu<sup>II</sup>-SSZ-13 catalyst synthesized by Cu<sup>II</sup>(NO<sub>3</sub>)<sub>2</sub> as copper precursors.

Figure S2 shows the NO conversion of fresh Cu<sup>II</sup>-SSZ-13 catalyst synthesized by Cu<sup>II</sup>(NO<sub>3</sub>)<sub>2</sub> as copper precursors at different gaseous hourly space velocity. When the GHSV are 10000 and 40,000 h<sup>-1</sup>, the deNO<sub>x</sub> activity of the catalyst is similar. However, when the GHSV reaches 70,000 h<sup>-1</sup>, the catalyst activity is low at the whole temperature range. Therefore, the GHSV are 40000 h<sup>-1</sup> is preferentially used as the optimal space velocity.
